# Supplementary material for: Response of Bovine Cumulus–Oocytes Complexes to Energy Pathway Inhibition during In Vitro Maturation
Source: MDPI journal article supplement (doi:10.3390/genes12060838), 2021-05-29
Supplement: s1 [file genes-1173209-supplementary.pdf › genes-1173209-supplementary.pdf]

The results of Primer-BLAST analysis with the bioinformatics tool:  
<https://www.ncbi.nlm.nih.gov/tools/primer-blast/index.cgi>

### Primer pair for ACACA gene

|                | Sequence (5'->3') | Length | Tm    | GC%   | Self complementarity |
|----------------|-------------------|--------|-------|-------|----------------------|
| Forward primer | GGAACCGTGAAGGCCTA | 18     | 58.60 | 61.11 | 6.00                 |
| Reverse primer | TGGACCAAGCTGCGGAT | 17     | 58.48 | 58.82 | 5.00                 |

>[NM\\_174224.2](#) Bos taurus acetyl-CoA carboxylase alpha (ACACA), mRNA

product length = 159

```
Forward primer  1      GGAACCGTGAAGGCCTA  18
Template        7108  .....  7125
```

```
Reverse primer  1      TGGACCAAGCTGCGGAT  17
Template        7266  .....  7250
```

### Primer pair for CPT1B

|                | Sequence (5'->3')      | Length | Tm    | GC%   | Self complementarity |
|----------------|------------------------|--------|-------|-------|----------------------|
| Forward primer | AAGAGATCAAGCCTGTGATGGC | 22     | 60.68 | 50.00 | 7.00                 |
| Reverse primer | GGATGCGAGTGGTGTGAA     | 19     | 58.07 | 52.63 | 3.00                 |

>[NM\\_001034349.2](#) Bos taurus carnitine palmitoyltransferase 1B (CPT1B), mRNA

product length = 84

```
Forward primer  1      AAGAGATCAAGCCTGTGATGGC  22
Template        1076  .....  1097
```

```
Reverse primer  1      GGATGCGAGTGGTGTGAA  19
Template        1159  .....  1141
```

## Primer pair for PLIN2 gene

|                | Sequence (5'→3')     | Length | Tm    | GC%   | Self complementarity |
|----------------|----------------------|--------|-------|-------|----------------------|
| Forward primer | GAGTGGAAGAGAAGCATCGG | 20     | 58.07 | 55.00 | 4.00                 |
| Reverse primer | GTGACTCAATGTGCTCAGCA | 20     | 58.48 | 50.00 | 7.00                 |

>[NM\\_173980.2](#) Bos taurus perilipin 2 (PLIN2), mRNA

product length = 67

```
Forward primer  1      GAGTGGAAGAGAAGCATCGG  20
Template       915      .....  934
```

```
Reverse primer  1      GTGACTCAATGTGCTCAGCA  20
Template       981      .....  962
```

## Primer pair for TXNRD1 gene

|                              | Sequence (5'→3')     | Length | Tm    | GC%   | Self complementarity |
|------------------------------|----------------------|--------|-------|-------|----------------------|
| Forward primer               | GCCAAGGAGGCAGCCA     | 16     | 59.16 | 68.75 | 5.00                 |
| Reverse primer               | GTTCTCCAAGACCCCATCTA | 21     | 58.52 | 52.38 | 3.00                 |
| Products on target templates |                      |        |       |       |                      |

>[NM\\_174625.5](#) Bos taurus thioredoxin reductase 1 (TXNRD1), mRNA

product length = 92

```
Forward primer  1      GCCAAGGAGGCAGCCA  16
Template       299      .....  314
```

```
Reverse primer  1      GTTCCTCCAAGACCCCATCTA  21
Template       390      .....  370
```

## Primer pair for FASN gene

|                | Sequence (5'->3')    | Length | Tm    | GC%   | Self complementarity |
|----------------|----------------------|--------|-------|-------|----------------------|
| Forward primer | CTGCCGAAGACAGGGATTG  | 19     | 58.23 | 57.89 | 3.00                 |
| Reverse primer | CTGGTATACCTTCCCGCTCG | 20     | 59.69 | 60.00 | 8.00                 |

>[NM\\_001012669.1](#) Bos taurus fatty acid synthase (FASN), mRNA

product length = 108

```
Forward primer  1      CTGCCGAAGACAGGGATTG   19
Template        2863  .....                2881
```

```
Reverse primer  1      CTGGTATACCTTCCCGCTCG   20
Template        2970  .....                2951
```

## Primer pair for CD36 gene

|                | Sequence (5'->3')          | Length | Tm    | GC%   | Self complementarity |
|----------------|----------------------------|--------|-------|-------|----------------------|
| Forward primer | AAAAATTGAAGCATTGAAGAATCTGA | 26     | 56.88 | 26.92 | 5.00                 |
| Reverse primer | CCCAGTCACTTGATTTCTGAACA    | 23     | 58.86 | 43.48 | 5.00                 |

>[NM\\_001278621.1](#) Bos taurus CD36 molecule (CD36), transcript variant 1, mRNA

product length = 118

```
Forward primer  1      AAAAATTGAAGCATTGAAGAATCTGA   26
Template        1604  .....                1629
```

```
Reverse primer  1      CCCAGTCACTTGATTTCTGAACA   23
Template        1721  .....                1699
```

>[NM\\_174010.3](#) Bos taurus CD36 molecule (CD36), transcript variant 2, mRNA

product length = 118

```

Forward primer 1      AAAAAATTGAAGCATTGAAGAATCTGA 26
Template      1446  ..... 1471

Reverse primer 1      CCCAGTCACTTGATTTCTGAACA 23
Template      1563  ..... 1541

```

## Primer pair for PFKP gene

|                              | Sequence (5'→3')     | Length | Tm    | GC%   | Self complementarity |
|------------------------------|----------------------|--------|-------|-------|----------------------|
| Forward primer               | CGGGACCTGCAGTCCAAC   | 18     | 60.36 | 66.67 | 8.00                 |
| Reverse primer               | CTGCAGCTCTCGTTCCTGAG | 20     | 60.46 | 60.00 | 6.00                 |
| Products on target templates |                      |        |       |       |                      |

>[NM\\_001193220.3](#) Bos taurus phosphofructokinase, platelet (PFKP), mRNA

```

product length = 89
Forward primer 1      CGGGACCTGCAGTCCAAC 18
Template      1893  ..... 1910

Reverse primer 1      CTGCAGCTCTCGTTCCTGAG 20
Template      1981  ..... 1962

```

## Primer pair for LDHA gene

|                | Sequence (5'→3')        | Length | Tm    | GC%   | Self complementarity |
|----------------|-------------------------|--------|-------|-------|----------------------|
| Forward primer | TGACTCTAGTGTGCCTGTATGG  | 22     | 59.24 | 50.00 | 6.00                 |
| Reverse primer | GATCACCTCATAAGCACTGTCAA | 23     | 58.49 | 43.48 | 4.00                 |

>[NM\\_174099.2](#) Bos taurus lactate dehydrogenase A (LDHA), mRNA

```

product length = 145
Forward primer 1      TGACTCTAGTGTGCCTGTATGG 22
Template      740  ..... 761

```

Reverse primer 1 GATCACCTCATAAGCACTGTCAA 23  
Template 884 ..... 862

### Primer pair for PDHA1 gene

|                | Sequence (5'→3')     | Length | Tm    | GC%   | Self complementarity |
|----------------|----------------------|--------|-------|-------|----------------------|
| Forward primer | TGCAGAGCTTACAGGACGAA | 20     | 59.03 | 50.00 | 4.00                 |
| Reverse primer | TCCCAGGGGCACCTGA     | 16     | 58.93 | 68.75 | 8.00                 |

>[NM\\_001101046.2](#) Bos taurus pyruvate dehydrogenase E1 subunit alpha 1 (PDHA1), mRNA; nuclear gene for mitochondrial product

product length = 118

Forward primer 1 TGCAGAGCTTACAGGACGAA 20  
Template 509 ..... 528

Reverse primer 1 TCCCAGGGGCACCTGA 16  
Template 626 ..... 611

### Primer pair for SLC2A1 gene

|                              | Sequence (5'→3')         | Length | Tm    | GC%   | Self complementarity |
|------------------------------|--------------------------|--------|-------|-------|----------------------|
| Forward primer               | GCTACAACACTGGAGTCATCAACG | 24     | 61.90 | 50.00 | 4.00                 |
| Reverse primer               | CGGAGAAGGAACCAATCATGC    | 21     | 59.33 | 52.38 | 4.00                 |
| Products on target templates |                          |        |       |       |                      |

>[NM\\_174602.2](#) Bos taurus solute carrier family 2 member 1 (SLC2A1), mRNA

product length = 168

Forward primer 1 GCTACAACACTGGAGTCATCAACG 24  
Template 250 ..... 273

Reverse primer 1 CGGAGAAGGAACCAATCATGC 21  
Template 417 ..... 397

## Primer pair for G6PDH gene

|                              | Sequence (5'->3')   | Length | Tm    | GC%   | Self complementarity |
|------------------------------|---------------------|--------|-------|-------|----------------------|
| Forward primer               | CACCATCTGGTGGCTGTTC | 19     | 58.44 | 57.89 | 8.00                 |
| Reverse primer               | TTCTCCTCCGGGGTAGCT  | 18     | 58.89 | 61.11 | 6.00                 |
| Products on target templates |                     |        |       |       |                      |

>[NM\\_001244135.2](#) Bos taurus glucose-6-phosphate dehydrogenase (G6PD), mRNA

product length = 135

```
Forward primer  1  CACCATCTGGTGGCTGTTC  19
Template        240 ..... 258
```

```
Reverse primer  1  TTCTCCTCCGGGGTAGCT  18
Template        374 ..... 357
```

## Primer pair for bCS gene

|                | Sequence (5'->3')       | Length | Tm    | GC%   | Self complementarity |
|----------------|-------------------------|--------|-------|-------|----------------------|
| Forward primer | ATCACTGTGGACATGATGTATGG | 23     | 58.29 | 43.48 | 8.00                 |
| Reverse primer | CTCTAAAACGGATGCCCTCA    | 20     | 57.31 | 50.00 | 3.00                 |

>[NM\\_001044721.1](#) Bos taurus citrate synthase (CS), mRNA; nuclear gene for mitochondrial product

product length = 97

```
Forward primer  1  ATCACTGTGGACATGATGTATGG  23
Template        298 ..... 320
```

```
Reverse primer  1  CTCTAAAACGGATGCCCTCA  20
Template        394 ..... 375
```

## Primer pair for GAPDH gene

|                              | Sequence (5'→3')     | Length | Tm    | GC%   | Self complementarity |
|------------------------------|----------------------|--------|-------|-------|----------------------|
| Forward primer               | ACCCTCAAGATTGTCAGCAA | 20     | 57.04 | 45.00 | 4.00                 |
| Reverse primer               | GCGTGGACAGTGGTCATAAG | 20     | 58.64 | 55.00 | 3.00                 |
| Products on target templates |                      |        |       |       |                      |

>[NM\\_001034034.2](#) Bos taurus glyceraldehyde-3-phosphate dehydrogenase (GAPDH), mRNA

product length = 113

```
Forward primer 1 ACCCTCAAGATTGTCAGCAA 20
Template      492 ..... 511
```

```
Reverse primer 1 GCGTGGACAGTGGTCATAAG 20
Template      604 ..... 585
```

## Primer pair for YWHAZ gene

|                | Sequence (5'→3')       | Length | Tm    | GC%   | Self complementarity |
|----------------|------------------------|--------|-------|-------|----------------------|
| Forward primer | TGAACTCCCCTGAGAAAGCCT  | 21     | 60.77 | 52.38 | 3.00                 |
| Reverse primer | ATCCGATGTCCACAATGTCAAG | 22     | 58.73 | 45.45 | 5.00                 |

>[NM\\_174814.2](#) Bos taurus tyrosine 3-monooxygenase/tryptophan 5-monooxygenase activation protein zeta (YWHAZ), mRNA

product length = 149

```
Forward primer 1 TGAACTCCCCTGAGAAAGCCT 21
Template      598 ..... 618
```

```
Reverse primer 1 ATCCGATGTCCACAATGTCAAG 22
Template      746 ..... 725
```
